# Supplementary material
Source: PubMed Central journal article supplement (PMC2812926)
Supplement: NIHMS147190-supplement-1_si_001.pdf [file NIHMS147190-supplement-1_si_001.pdf]

# Flexible Cyclic Ethers/Polyethers as Novel P2-Ligands for HIV-1 Protease Inhibitors: Design, Synthesis, Biological Evaluation and Protein-ligand X-ray Studies

*Arun K. Ghosh,<sup>\*,†</sup> Sandra Gemma,<sup>†</sup> Abigail Baldrige,<sup>†</sup> Sofiya Leshchenko,<sup>†</sup> Yuan-Fang  
Wang,<sup>≠</sup> Andrey Yu. Kovalevsky,<sup>≠</sup> Yashiro Koh,<sup>⊥</sup> Irene T. Weber,<sup>≠</sup> and Hiroaki  
Mitsuya<sup>&,⊥</sup>*

HPLC (Table 1SI) and HRMS (Table 2SI) data of inhibitors **3a-m**. Crystallographic Data  
Collection and Refinement Statistics (Table 3SI).

**Table 1.** Purity of inhibitors **3a-m**

| <b>Inhibitor</b> | <b>Solvent system<sup>a</sup></b> | <b>Retention Time (min)</b> | <b>Purity (%)</b> | <b>Column</b>                    | <b>Flow rate (mL/Min)</b> |
|------------------|-----------------------------------|-----------------------------|-------------------|----------------------------------|---------------------------|
| <b>3a</b>        | A                                 | 12.2                        | 98%               | XDB-C18 5 $\mu$ M<br>4.6 x 150mm | 2.0                       |
|                  | B                                 | 10.3                        | 99%               | XDB-C18 5 $\mu$ M<br>4.6 x 150mm | 2.0                       |
| <b>3b</b>        | A                                 | 12.3                        | 98%               | XDB-C18 5 $\mu$ M<br>4.6 x 150mm | 2.0                       |
|                  | B                                 | 10.4                        | 99%               | XDB-C18 5 $\mu$ M<br>4.6 x 150mm | 2.0                       |
| <b>3c</b>        | A                                 | 12.7                        | 98%               | XDB-C18 5 $\mu$ M<br>4.6 x 150mm | 2.0                       |
|                  | B                                 | 10.6                        | 98%               | XDB-C18 5 $\mu$ M<br>4.6 x 150mm | 2.0                       |
| <b>3d</b>        | A                                 | 12.3                        | 98%               | XDB-C18 5 $\mu$ M<br>4.6 x 150mm | 2.0                       |
|                  | B                                 | 10.3                        | 98%               | XDB-C18 5 $\mu$ M<br>4.6 x 150mm | 2.0                       |
| <b>3e</b>        | A                                 | 13.7                        | 99%               | XDB-C18 5 $\mu$ M<br>4.6 x 150mm | 2.0                       |
|                  | B                                 | 13.5                        | 99%               | XDB-C18 5 $\mu$ M<br>4.6 x 150mm | 2.0                       |
| <b>3f</b>        | A                                 | 13.6                        | 97%               | XDB-C18 5 $\mu$ M<br>4.6 x 150mm | 2.0                       |
|                  | B                                 | 13.1                        | 96%               | XDB-C18 5 $\mu$ M<br>4.6 x 150mm | 2.0                       |
| <b>3g</b>        | A                                 | 16.9                        | 99%               | XDB-C18 5 $\mu$ M<br>4.6 x 150mm | 2.0                       |
|                  | B                                 | 15.4                        | 99%               | XDB-C18 5 $\mu$ M<br>4.6 x 150mm | 2.0                       |
| <b>3h</b>        | A                                 | 11.8                        | 97%               | XDB-C18 5 $\mu$ M<br>4.6 x 150mm | 2.0                       |
|                  | B                                 | 9.8                         | 98%               | XDB-C18 5 $\mu$ M<br>4.6 x 150mm | 2.0                       |
| <b>3i</b>        | A                                 | 13.3                        | 98%               | XDB-C18 5 $\mu$ M<br>4.6 x 150mm | 2.0                       |
|                  | B                                 | 11.2                        | 96%               | XDB-C18 5 $\mu$ M<br>4.6 x 150mm | 2.0                       |
| <b>3j</b>        | A                                 | 11.7                        | 97%               | XDB-C18 5 $\mu$ M<br>4.6 x 150mm | 2.0                       |

|           |   |      |      |                                  |     |
|-----------|---|------|------|----------------------------------|-----|
|           | B | 10.5 | 97%  | XDB-C18 5 $\mu$ M<br>4.6 x 150mm | 2.0 |
| <b>3k</b> | A | 15.0 | 98%  | XDB-C18 5 $\mu$ M<br>4.6 x 150mm | 2.0 |
|           | B | 17.8 | 99%  | XDB-C18 5 $\mu$ M<br>4.6 x 150mm | 2.0 |
| <b>3l</b> | A | 11.5 | 95%  | XDB-C18 5 $\mu$ M<br>4.6 x 150mm | 2.0 |
|           | B | 9.3  | >99% | XDB-C18 5 $\mu$ M<br>4.6 x 150mm | 2.0 |
| <b>3m</b> | A | 8.1  | >99% | XDB-C18 5 $\mu$ M<br>4.6 x 150mm | 2.0 |
|           | B | 7.2  | 98%  | XDB-C18 5 $\mu$ M<br>4.6 x 150mm | 2.0 |

<sup>a</sup>A= linear gradient from 20% acetonitrile, 80% water containing 0.05% trifluoroacetic acid to 80% acetonitrile, 20% water containing 0.05% trifluoroacetic acid in 20 min. B= linear gradient from 20% methanol, 80% water containing 0.05% trifluoroacetic acid to 100% MeOH in 20 min.

**Table 2.** HRMS for inhibitors **3a-m**

|           |                                                                                                                                                            |
|-----------|------------------------------------------------------------------------------------------------------------------------------------------------------------|
| <b>3a</b> | HRMS ( <i>m/z</i> ) calcd for C <sub>28</sub> H <sub>40</sub> N <sub>2</sub> NaO <sub>8</sub> S [M+Na] <sup>+</sup> 587.2403, found 587.2380               |
| <b>3b</b> | HRMS ( <i>m/z</i> ) calcd for C <sub>27</sub> H <sub>38</sub> N <sub>2</sub> NaO <sub>8</sub> S [M+Na] <sup>+</sup> 573.2247, found 573.2260               |
| <b>3c</b> | HRMS ( <i>m/z</i> ) calcd for C <sub>28</sub> H <sub>40</sub> N <sub>2</sub> NaO <sub>8</sub> S [M+Na] <sup>+</sup> 587.2403, found 587.2405               |
| <b>3d</b> | HRMS ( <i>m/z</i> ) calcd for C <sub>27</sub> H <sub>38</sub> N <sub>2</sub> NaO <sub>8</sub> S [M+Na] <sup>+</sup> 573.2247, found 573.2254               |
| <b>3e</b> | HRMS ( <i>m/z</i> ) calcd for C <sub>28</sub> H <sub>40</sub> N <sub>2</sub> NaO <sub>7</sub> S [M+Na] <sup>+</sup> 571.2454, found 571.2458               |
| <b>3f</b> | HRMS ( <i>m/z</i> ) calcd for C <sub>28</sub> H <sub>40</sub> N <sub>2</sub> NaO <sub>7</sub> S [M+Na] <sup>+</sup> 573.2454, found 571.2452               |
| <b>3g</b> | HRMS ( <i>m/z</i> ) calcd for C <sub>29</sub> H <sub>42</sub> N <sub>2</sub> NaO <sub>6</sub> S [M+Na] <sup>+</sup> 569.2661, found 569.2663               |
| <b>3h</b> | HRMS ( <i>m/z</i> ) calcd for C <sub>26</sub> H <sub>36</sub> N <sub>2</sub> NaO <sub>8</sub> S [M+Na] <sup>+</sup> 559.2090, found 559.2094               |
| <b>3i</b> | HRMS ( <i>m/z</i> ) calcd for C <sub>29</sub> H <sub>42</sub> N <sub>2</sub> NaO <sub>9</sub> S [M+Na] <sup>+</sup> 617.2509, found 617.2501               |
| <b>3j</b> | HRMS ( <i>m/z</i> ) calcd for C <sub>31</sub> H <sub>46</sub> N <sub>2</sub> NaO <sub>10</sub> S [M+Na] <sup>+</sup> 661.2771, found 661.2788              |
| <b>3k</b> | HRMS ( <i>m/z</i> ) calcd for C <sub>30</sub> H <sub>44</sub> N <sub>2</sub> NaO <sub>10</sub> S [M+Na] <sup>+</sup> 647.2615, found 647.2590              |
| <b>3l</b> | HRMS ( <i>m/z</i> ) calcd for C <sub>29</sub> H <sub>42</sub> N <sub>2</sub> NaO <sub>10</sub> S <sub>2</sub> [M+Na] <sup>+</sup> 665.2179, found 665.2191 |
| <b>3m</b> | HRMS ( <i>m/z</i> ) calcd for C <sub>30</sub> H <sub>46</sub> N <sub>3</sub> O <sub>8</sub> S [M+H] <sup>+</sup> 608.3006, found 608.3009                  |

**Table 3.** Crystallographic Data Collection and Refinement Statistics

|                                                |                                  |
|------------------------------------------------|----------------------------------|
| Space group                                    | P2 <sub>1</sub> 2 <sub>1</sub> 2 |
| Unit cell dimensions: (Å)                      |                                  |
| a                                              | 57.96                            |
| b                                              | 86.41                            |
| c                                              | 46.03                            |
| Resolution range (Å)                           | 50-1.00                          |
| Unique reflections                             | 110,362                          |
| R <sub>merge</sub> (%) overall (final shell)   | 8.0 (41.1)                       |
| I/σ(I) overall (final shell)                   | 16.5 (2.6)                       |
| Completeness (%) overall (final shell)         | 88.4 (52.6)                      |
| Data range for refinement (Å)                  | 10-1.00                          |
| R (%)                                          | 14.9                             |
| R <sub>free</sub> (%)                          | 17.5                             |
| No. of solvent atoms (total occupancies)       | 173.2                            |
| RMS deviation from ideality                    |                                  |
| Bonds (Å)                                      | 0.017                            |
| Angle distance (Å)                             | 0.034                            |
| Average B-factors (Å <sup>2</sup> )            |                                  |
| Main-chain atoms                               | 11.4                             |
| Side-chain atoms                               | 16.5                             |
| Inhibitor                                      | 12.9                             |
| Solvent                                        | 22.6                             |
| Residual density (max/min) (eÅ <sup>-3</sup> ) | 0.40/-0.29                       |
